# Supplementary material
Source: Research Square preprint supplement (doi:10.21203/rs.3.rs-8661596/v1)
Supplement: Supplementary file 1 [file 87808be18ed39be149ad339f.docx]

**Appendix A** : **Selected questions and their corresponding Δ**

The examination consists of 20 questions and was administered to students, who received a score out of 20. For each question, we have the number of students who selected each answer option (A, B, C, D, or E), and these data are broken down by three performance groups: students who scored less than 7 out of 20, those who scored between 8 and 11, and those who scored at least 12 points out of 20.

From these data, we calculate the Delta index for each question using the following formula:

Δ = PropSup - PropInf

where PropSup is the proportion of students who gave the correct answer among those who scored ≥ 12/20, and ProfInf is the proportion of students who gave the correct answer among those who scored < 7/20.

This Δ index allows us to assess the discriminating power of each question, that is, its ability to distinguish high-performing students from struggling students.

Interpretation of Δ values:

- High Δ (close to 1): The question has excellent discriminating power. High-performing students overwhelmingly succeed on this question while struggling students fail, indicating that the question effectively measures mastery of the assessed content.
- Moderate Δ (approximately 0.3 to 0.5): The question has acceptable discriminating power. It reasonably differentiates between the two groups of students, although some weak students may also answer it correctly.
- Low or zero Δ (close to 0): The question does not discriminate between high-performing and struggling students. This may indicate that the question is either too easy (everyone succeeds), or that it assesses non-essential knowledge, or that it is poorly worded.
- Negative Δ: A problematic situation where weak students perform better than high-performing students. This suggests a poorly designed, ambiguous question, or one whose wording misleads the best students. Such questions should be revised or eliminated.

The following table presents the analysis of the exam questions presented to the students and which have been selected (Δ > 0.50) for the chatbots testing.

| Question’s Number | PropSuf | PropInf | Delta |
| --- | --- | --- | --- |
| 1 | 0.96 | 0.42 | **0.54** |
| 2 | 0.91 | 0.40 | **0.51** |
| 3 | 0.87 | 0.66 | 0.21 |
| 4 | 0.25 | 0.01 | 0.24 |
| 5 | 0.75 | 0.21 | **0.53** |
| 6 | 0.87 | 0.21 | **0.66** |
| 7 | 0.94 | 0.30 | **0.64** |
| 8 | 0.68 | 0.23 | 0.45 |
| 9 | 0.25 | 0.29 | -0.04 |
| 10 | 0.60 | 0.04 | **0.56** |
| 11 | 0.89 | 0.32 | **0.57** |
| 12 | 0.37 | 0.12 | 0.25 |
| 13 | 0.97 | 0.65 | 0.31 |
| 14 | 0.76 | 0.23 | **0.53** |
| 15 | 0.68 | 0.20 | 0.48 |
| 16 | 0.79 | 0.28 | **0.51** |
| 17 | 0.48 | 0.14 | 0.34 |
| 18 | 0.95 | 0.42 | **0.53** |
| 19 | 1.00 | 0.64 | 0.36 |
| 20 | 0.95 | 0.46 | 0.49 |

Therefore, the selected questions (in French) are the following, the right answer is in bold:

*Q1* Que vaut la vitesse de propagation de la lumière dans le verre ? Les réponses proposées sont

1. 0 m/s
2. 1.82 ×10^8m/s
3. **2.00 ×10^8m/s**
4. 3.00×108^m/s
5. 5.49 ×10^−9m/s

*Q2* Planck a révolutionné la physique moderne en postulant un lien entre énergie et fréquence. Cette relation s’écrit :

1. E=hf
2. E=hc/λ
3. E=ℏω
4. **Les propositions de A à C sont toutes correctes**
5. Les propositions de A à C sont toutes incorrectes

*Q5* Au vu de la distance entre les atomes d’un cristal de NaCl, des rayons X incidents vont typiquement subir un phénomène de

1. **diffraction**
2. polarisation
3. dispersion
4. absorption
5. Les propositions de A à D sont toutes correctes

*Q6* Un faisceau lumineux arrive sur une interface air/eau. Quelle fraction de l’intensité lumineuse – exprimée en % - est transmise ? Supposez qu’il n’y a pas d’absorption.

1. 0.4%
2. 2.0%
3. **98.0%**
4. 99,6.0%
5. Les propositions de A à D sont toutes incorrectes

*Q7* Un prisme fait de fluorure de magnésium 𝑀𝑔𝐶𝑙2MgCl2 possède un indice de réfraction de 1.377 à 587 nm. Quel est l’angle critique pour la réflexion totale ? On suppose le prisme entouré d’air

1. 24.4°
2. **46.6°**
3. 56.4°
4. 90°
5. Les propositions de A à D sont toutes incorrectes

*Q10* Le graphite est composé d’un empilement de plans parallèles de graphène qui est un matériau bidimensionnel (i.e. une couche monoatomique d’atome de carbone). La distance entre chaque plan de graphène est de 0.33 nm.  Si un faisceau monochromatique de rayons X de 1 Å de longueur d’onde est dirigé vers du graphite, quel est l’angle le plus petit (et non nul) pour lequel on obtiendra une interférence constructive ?

1. **8.7°**
2. 9.6°
3. 19.5°
4. 20.4°
5. 21.5°

*Q11* Un faisceau de lumière est incident sur une interface entre un verre borosilicaté d’indice de réfraction 1.55 et d’un matériau inconnu. La lumière est incidente côté verre, l’angle entre l’interface et le faisceau lumineux vaut 60°. Le faisceau réfracté sort avec un angle de 35.6° par rapport à la normale. Quel est ce matériau inconnu ?

1. De l’air
2. **De l’eau**
3. Du verre
4. Du fluorure de magnésium
5. Il est impossible de déterminer le matériau inconnu avec ces données

*Q14* Question pour un champion. Je suis la partie de l’œil jouant le plus grand rôle dans la puissance de l’oeil, je suis

1. **La cornée**
2. Le cristallin
3. La pupille
4. La rétine
5. L’humeur aqueuse

*Q16* Afin de calculer le grossissement commercial d’un microscope, il est nécessaire de connaitre

1. La distance focale de l’oculaire et la distance objet de l’oculaire
2. La distance focale de l’objectif et la distance objet de l’objectif
3. La distance focale de l’objectif et la distance objet de l’oculaire
4. La distance focale de l’oculaire et la distance objet de l’objectif
5. **La puissance de l’objectif et de l’oculaire et la longueur optique**

*Q18* Quel est le grossissement angulaire d’une loupe de 25 cm de distance focale ?

1. **1 fois**
2. 2 fois
3. 5 fois
4. 40 fois
5. Les propositions de A à D sont toutes incorrectes

**Appendix B : LLM Selection and Technical Specifications**

This section provides an overview of the technical characteristics of the six chatbots examined in this study (July 2025), including their underlying language models, architectural features, and key functionalities.

To ensure a fair and rigorous comparison, all chatbots were provided with identical inputs: the same prompt and the same educational resources, including PowerPoint presentations, videos, and text documents. NotebookLM does not have any pre-recorded metaprompt, but still get the same initial prompt. Before analyzing their respective outputs, this section presents the technical characteristics of each platform, including their underlying language models, architectural features, and key functionalities that may influence their processing and interpretation of these materials. It should be noted that few data are available from the companies, so the following are given to the best of our knowledge.

- **Copilot Studio Studio (agent)**
  - Model : GPT-4 Turbo
  - Temperature : 0.2-0.3 (auto-declaration)
  - Top-p : +/-0.9 (auto-declaration)
  - Top-k : +/- 40 (auto-declaration)

- **OpenAI assistant**
  - Type of chatbot : assistant freely accessible through a webpage (API)
  - Model : gtp-4o (model used in ChatGPT)
  - Tools : file search, code interpreter
  - Response format : text
  - Temperature : 1.00, representing a balanced approach between deterministic and creative outputs, allowing for natural variation in responses while maintaining coherence.
  - Top P : 1.00, ensuring no restriction on the token selection pool and allowing the temperature parameter to fully govern response variability.
- **Mistral**
  - Standard interface : Le Chat
  - Model : Mistral Large 2
  - Temperature and TopP : No public documentation available on these parameters
- **Grok**
  - Model : Grok 4
  - Temperature : According to some users, the temperature would be low by default (officially unverified information)
- **NotebookLM**
  - Model : Gemini 1.5 Pro
  - Temperature and TopP : No public documentation available on these parameters
  - Interaction only with user-provided documents, grounded and secured approach
- **Amanote**
  - Plugin installed on the university's Moodle platform (version 4.5)
  - Model : eu.anthropic.claude-3-7-sonnet-20250219-v1
  - Temperature and TopP : No public documentation available on these parameters

**Appendix C : Initial and follow up prompts**

***Initial prompt (French)***

*Tu es un tuteur d'optique pour des étudiants de première année d'université. Tu dois répondre en français. Pour chaque question QCM qui t'est posée, tu dois indiquer la lettre de la réponse que tu juges correcte sous la forme "Réponse: X" (où X=A, B, C, D ou E).*  Tu es obligé de donner une réponse parmi celles proposées.

***Translation***

*You are an optics tutor for first-year university students. You must answer in French. For each multiple-choice question you are asked, you must indicate the letter of the answer you consider correct in the form “Answer: X” (where X=A, B, C, D, or E). You must choose one of the answers provided.*

**Follow-up prompt (French)**

*Tu viens de répondre « [copier/coller de sa réponse] ». Es-tu sûr de cette réponse ? Vérifie ton raisonnement étape par étape. Si tu détectes une erreur de logique, de calcul ou d’interprétation du cours, corrige-la et indique la lettre correcte. Réponds en conservant le format : « Réponse confirmée : X » ou « Réponse corrigée : Y » + justification courte.*

***Translation***

*You just answered “[copy/paste your answer].” Are you sure about this answer? Check your reasoning step by step. If you detect an error in logic, calculation, or interpretation of the course material, correct it and indicate the correct letter. Respond using the following format: “Answer confirmed: X” or “Answer corrected: Y” + brief justification.*
